# Supplementary material for: Tailoring sub-3.3 Å ultramicropores in advanced carbon molecular sieve membranes for blue hydrogen production
Source: PubMed Central journal article supplement — Sci Adv. 2022 Mar 9;8(10):eabl8160. doi: 10.1126/sciadv.abl8160 (PMC8906570; doi:10.1126/sciadv.abl8160), 2022-03-09
Supplement: sciadv.abl8160_sm.pdf [file sciadv.abl8160_sm.pdf]

Supplementary Materials for  
**Tailoring sub-3.3 Å ultramicropores in advanced carbon molecular sieve  
membranes for blue hydrogen production**

Leiqing Hu, Vinh T. Bui, Ajay Krishnamurthy, Shouhong Fan, Wenji Guo, Sankhajit Pal,  
Xiaoyi Chen, Gengyi Zhang, Yifu Ding, Rajinder P. Singh, Monica Lupion, Haiqing Lin\*

\*Corresponding author. Email: [haiqingl@buffalo.edu](mailto:haiqingl@buffalo.edu)

Published 9 March 2022, *Sci. Adv.* **8**, eabl8160 (2022)  
DOI: 10.1126/sciadv.abl8160

**This PDF file includes:**

Supplementary Text  
Figs. S1 to S8  
Tables S1 to S10  
References

## Supplementary Text

### Materials

Celazole® PBI S10 solution containing  $\approx 9.5$  wt% PBI (with a molecular weight of 35,000 Da) was purchased from PBI Performance Products Inc. (Charlotte, NC). PPA and methanol were obtained from Sigma-Aldrich Corporation (St. Louis, MO). Ultrapure H<sub>2</sub>, CO<sub>2</sub>, C<sub>2</sub>H<sub>6</sub>, and N<sub>2</sub> were provided by Airgas Inc. (Buffalo, NY).

### Superior H<sub>2</sub>/CO<sub>2</sub> Separation Performance of PBI-PPA<sub>0.30</sub>/CMS600

Table S1 compares PBI-PPA<sub>0.34</sub> and PBI-PPA<sub>0.30</sub>/CMS600 with cross-linked PBIs and leading CMS membrane materials for H<sub>2</sub>/CO<sub>2</sub> separation. Among all cross-linked PBIs, PBI-PPA<sub>0.34</sub> shows the best combination of high H<sub>2</sub> permeability and high H<sub>2</sub>/CO<sub>2</sub> selectivity at 150 °C (21, 24, 25). After the carbonization, the obtained PBI-PPA<sub>0.30</sub>/CMS600 also displays H<sub>2</sub>/CO<sub>2</sub> separation performance superior to other CMS materials (4, 38-40, 44). Fig. S1 also compares PBI-PPA<sub>0.30</sub>/CMS600 with the leading inorganic membranes for H<sub>2</sub>/CO<sub>2</sub> separation. The PBI-PPA<sub>0.30</sub>/CMS600 shows one of the best H<sub>2</sub>/CO<sub>2</sub> separation properties, in addition to the simplicity for the fabrication of the polymeric membranes compared with those inorganic membranes.

### Determination of the PPA doping level

Fig. S2a presents the doping level of PBI-PPA films as a function of the molar ratio of PPA to the PBI repeating unit in the solutions. Increasing the acid amount in the solutions increases the doping level. At the same molar ratio, the thick films show a slightly lower doping level than the thin films due to the self-limiting diffusion, i.e., the gradual formation of cross-linking on the surface may limit PPA diffusion into the films. Fig. S2b displays the effect of the doping time on the doping level of PPA in a PBI thin film of  $\approx 12$   $\mu\text{m}$  and a thick film of 50-70  $\mu\text{m}$ . The doping level increases with increasing doping time and levels off after about 48 h for the thin film and about 120 h for the thick film. Therefore, the doping time in this study was set at nominally 72 h for the thin films and 168 h for the thick films to ensure that the acid is evenly distributed in the films.

### Fourier-transform infrared (FTIR) spectra of PBI-PPA, PBI/CMS600, and PBI-PPA<sub>0.30</sub>/CMS600

Fig. S3a illustrates the strong interaction between PPA and PBI by FTIR spectra of PBI-PPA films. The characteristic peak at 910 cm<sup>-1</sup> representing the P–O bonding indicates the existence of PPA. The peaks at 870 and 945 cm<sup>-1</sup> can be ascribed to P(OH)<sub>2</sub>, which are somewhat diminished in intensity in the spectra of PBI-PPA, indicating the loss of protons in PPA due to proton transfer. Fig. S5a compares FTIR spectra of PBI, PBI-PPA<sub>0.30</sub>, and their CMS films carbonized at 600 °C. The peaks at 3342, 1625, and 1290 cm<sup>-1</sup> in the PBI represent –NH, C=N, and C–N bonds in the imidazole ring, respectively (53). The peak at 3342 cm<sup>-1</sup> disappears in the spectrum of PBI-PPA<sub>0.30</sub> because of the hydrogen bonding between –NH and PPA. Those functional groups disappeared after carbonization, indicating the opening and degradation of imidazole rings.

### Density of the PBI-PPA thin films

The density ( $\rho_b$ ) of the PBI-PPA thin films can be described using an additive model:

$$\frac{1}{\rho_m} = \frac{\omega_p}{\rho_p} + \frac{\omega_a}{\rho_a} = \frac{1}{\rho_p} + \left( \frac{1}{\rho_a} - \frac{1}{\rho_p} \right) \omega_a \quad (\text{Eq. S1})$$

where  $\omega$  is the weight fraction, and the subscripts of  $p$  and  $a$  represent the PBI and PPA, respectively. In this model, the density of PBI and PPA is assumed to be independent of their composition. As shown in Fig. S3b, the  $\rho_b$  can be satisfactorily modeled with a  $\rho_a$  valued of  $\approx 2.25 \text{ g/cm}^3$  that is higher than the density ( $\approx 2.00 \text{ g/cm}^3$ ) of pure PPA, suggesting the tightened structure in the PBI. The results suggest that the PBI may have a different density from the pure PBI. However, there is no other way to obtain the density of PPA and PBI in PBI-PPA<sub>x</sub>, which are needed for the analysis of the free volume. Therefore, the model is used in this study (23).

#### FFV of the PBI-PPA thin films

The specific volume of PBI-PPA films at around 150 °C can be estimated using Eq. S2 (24):

$$V_{150^\circ\text{C}} = V_{RT} \left( 1 + \bar{\alpha}_V \Delta T \right) \quad (\text{Eq. S2})$$

where  $V_{150^\circ\text{C}}$  and  $V_{RT}$  are the specific volume at 150 °C and 23 °C, respectively.  $\Delta T$  equals 127 K (i.e., the difference between 150 °C and 23 °C).  $\bar{\alpha}_V$  is the average volumetric thermal expansion coefficient in the PBI-PPA and can be estimated as (24):

$$\bar{\alpha}_V = \varphi_a \alpha_a + \varphi_p \alpha_p \quad (\text{Eq. S3})$$

where  $\varphi_a$  and  $\varphi_p$  are volume fractions of the PPA and PBI respectively.  $\alpha_a$  and  $\alpha_p$  are volumetric thermal expansion coefficients of the PPA and PBI, respectively. The  $\alpha_p$  is  $6.9 \times 10^{-5} \text{ K}^{-1}$  (24). However, no  $\alpha_a$  value was reported for PPA, and the value of  $4.8 \times 10^{-4} \text{ K}^{-1}$  ( $\alpha_a$  of phosphoric acid) was used due to their similar structures. The details of the calculation for the *FFV* at 150 °C are recorded in Table S3.

#### Gas transport properties of PBI-PPA thin films describing by the free volume model

The PPA doping mainly affects H<sub>2</sub> diffusivity (instead of solubility), and its permeability can be described using the free volume model:

$$P_A = A_p \exp(-B_p / FFV) \quad \dots\dots(\text{Eq. S4})$$

where  $A_p$  is a pre-exponential factor, and  $B_p$  is a constant related to the penetrant molecular size. Fig. S3c shows that both H<sub>2</sub> and CO<sub>2</sub> permeability can be described using the model with the  $B_p$  value of 0.28 for H<sub>2</sub> and 1.5 for CO<sub>2</sub>, consistent with the larger molecular size of CO<sub>2</sub>. Besides, H<sub>2</sub>/CO<sub>2</sub> selectivity can also be satisfactorily described using the model.

#### TGA and DTA curves of PPA, PBI and PBI-PPA<sub>0.34</sub> thin films

Fig. S4 shows the TGA and DTA curves of PPA, PBI, and PBI-PPA<sub>0.34</sub>, respectively. PPA starts to degrade at around 150 °C and displays two sharp DTA peaks at  $\approx 300 \text{ °C}$  (formation of (HPO<sub>3</sub>)<sub>n</sub>) and  $\approx 600 \text{ °C}$  (formation of P and P<sub>2</sub>O<sub>5</sub>). Besides, both PBI and PBI-PPA<sub>0.34</sub> films are thermally stable up to  $\approx 200^\circ\text{C}$ , and PBI-PPA<sub>0.34</sub> shows a mass loss between 200 and 400 °C due to the PPA decomposition. The introduction of the PPA decreases the decomposition temperature of PBI from  $\approx 600 \text{ °C}$  to  $\approx 530 \text{ °C}$ . PBI and PBI-PPA<sub>0.34</sub> have a similar mass loss at 600 °C, suggesting that the degraded PPA still exists in PBI at 600 °C. Fig. S5b shows that the mass loss of PBI-PPA/CMS600 increases with increasing doping level due to the decomposition of PPA. Fig. S5c displays the Raman spectra, confirming the carbon structures.

#### Positron Annihilation Lifetime Spectroscopy (PALS) of PBI-PPA and their CMS films

Typical lifetimes ( $\tau$ , ns) and their relative contributions or intensities ( $I$ , %) in polymers can be categorized as follows. The shortest lifetime is attributed to self-annihilation of para positronium (p-Ps), ( $\tau_{p-Ps}$  or  $\tau_1$ ) at nominally 0.125 ns, the intermediate component is due to the direct

positron-electron annihilation lifetime ( $\tau_2$ ) at around 0.35 – 0.5 ns, and the longest is due to ortho-positronium “pick-off” lifetime ( $\tau_{o-Ps}$  or  $\tau_3$ ) at around 1 – 5 ns. However, in the presence of functional groups having large electron affinity (such as the nitroaromatics consisting of imide functionalities used in the current study), there is often positron inhibition or quenching that can affect both the measured lifetimes and their relative intensities. Here, the lifetime analysis is conducted at intervals of 1 million counts until the maximum number of counts (nominally 4 million to 5 million counts in each case) to understand the possible effect of positron and positronium quenching over the data acquisition period. Specimens in this study predominantly exhibit at least one lifetime,  $\tau_2 \approx 0.35 - 0.37$  ns that corresponds to positron-electron annihilation process and an additional  $\tau_3 \approx 1 - 2$  ns component with low relative contributions. In scenarios where there is a  $\tau_3$ , a nominal  $\tau_1$  contribution is expected, and this was accounted for by adding and constraining  $\tau_1 \approx 125$  ps and assuming that the ratio of the  $I_3/I_1 = 3$ . The final analysis is derived based on the assumption that the samples contain a log-normal distribution of  $\tau_2$  (where the average  $\tau_2$  and its corresponding  $\sigma_2$  are estimated) along with  $\tau_1$  and  $\tau_3$  (where positronium contributions are observed).

The semi-empirical Tao-Eldrup model is typically fit to  $\tau_3$  data to obtain an average radius of nanoscale pores (R) according to Eq. S4 when the contributions in  $I_3 > 2$  %. The modified version of this equation (Eq. S5) can be utilized toward fitting  $\tau_2$  in samples that do not contain o-Ps contributions or when  $I_3 < 2$  %. However, since the majority of the specimens in this study display positron/positronium quenching over the data acquisition period, only the lifetimes and their relative contributions from the first million counts is instead presented in Fig. S5d and Table S4.

$$\tau_3 = 0.5 \left[ 1 - \frac{R}{R+1.656} + \frac{1}{2\pi} \sin \left( \frac{2\pi R}{R+1.656} \right) \right]^{-1} \quad (\text{Eq. S5})$$

$$\tau_2 = 0.26 \left[ 1 - \frac{R}{R+3.823} + \frac{1}{2\pi} \sin \left( \frac{2\pi R}{R+3.823} \right) \right]^{-1} \quad (\text{Eq. S6})$$

#### Elemental analysis by EDS

Table S6 shows the elemental composition of the cross-section of the PBI-PPA<sub>0.30</sub> and PBI-PPA<sub>0.30</sub>/CMS600 films. The measured P/C molar ratio in the PBI-PPA<sub>0.34</sub> and PBI-PPA<sub>0.30</sub> film are  $\approx 0.034$  and  $\approx 0.028$ , respectively, which are close to their corresponding theoretical values (0.034 and 0.030, respectively). Both PBI-PPA<sub>0.30</sub> thick and PBI-PPA<sub>0.30</sub>/CMS600 films show consistent N/C molar ratios and decreasing P/C molar ratios from the surface to the center, indicating that the PPA content is higher on the surface than the center caused by the self-limiting diffusion. The pyrolysis decreases the N/C ratio while retaining the P/C ratio, suggesting that the loss of the N but not for P after the pyrolysis.

#### Mechanical properties of PBI, PBI-PPA<sub>0.30</sub>, and their derived CMS films

Fig. S5e,f shows strain-stress tensile plots of PBI, PBI-PPA<sub>0.30</sub>, PBI/CMS500, and PBI/CMS550 obtained using the tensile test at 150 °C. The PPA doping decreases the fracture strain but increases the modulus value (Table S7), indicating that the acid doping leads to a ductile-to-brittle transition. PBI/CMS displays much lower fracture strains than PBI, and the strain decreases with the increasing carbonization temperature. It confirms that high carbonization temperature produces less flexible CMS membranes.

PBI/CMS600 and PBI-PPA<sub>0.30</sub>/CMS films were too fragile to be tested using the tensile. Therefore, their mechanical properties were tested using the three-point flexural test, as shown in Fig. S5g,h. Both PBI/CMS500 and PBI-PPA<sub>0.30</sub>/CMS500 have good extensibility and flexibility.

However, PBI/CMS600 and PBI-PPA<sub>0.30</sub>/CMS600 display low strains and high modulus values (Table S7), indicating that the films are becoming stiff and rigid after the carbonization at 600 °C.

Table S8 records the mechanical properties of PBI or carbonized materials for H<sub>2</sub>/CO<sub>2</sub> separation. Our PBI and CMS materials show comparable modulus and fracture strain compared with thermally rearranged (TR) polymers or other CMS materials.

#### Gas permeability of PBI-PPA thin films and PBI-PPA/CMS films

Fig. S6a,b shows that CO<sub>2</sub> permeability of PBI, PBI-PPA<sub>0.34</sub>, PBI/CMS600, and PBI-PPA<sub>0.30</sub>/CMS600 can be satisfactorily described using the Arrhenius equation with the parameters recorded in Table S9. The PPA doping increases the  $E_{P,A}$  values for both H<sub>2</sub> and CO<sub>2</sub> because of the decreased  $FFV$ , and the carbonization decreases the  $E_{P,A}$  value due to the increased  $FFV$ .

#### CO<sub>2</sub> diffusivity and its dependence on the temperature

Fig. S6c shows that CO<sub>2</sub> diffusivity can be satisfactorily described using the Arrhenius equation:

$$D_A = D_{0,A} \exp(-E_{D,A}/RT) \quad (\text{Eq. S7})$$

where  $D_{0,A}$  is a pre-exponential factor, and  $E_{D,A}$  is activation energy of the gas diffusion. The fitted values of  $D_{0,A}$  and  $E_{D,A}$  are recorded in Table S10. PBI-PPA<sub>0.34</sub> has higher  $E_{D,A}$  value (42 kJ/mol) than PBI (39 kJ/mol), consistent with the lower free volume of PBI-PPA<sub>0.34</sub>. After carbonization,  $E_{D,A}$  value decreases due to the increased porosity. Interestingly, PBI-PPA<sub>0.30</sub>/CMS600 has higher  $E_{D,A}$  value (27 kJ/mol) than PBI/CMS600 (22 kJ/mol) because of the stronger size-sieving ability of PPA<sub>0.30</sub>/CMS600.

#### Effects of $T_C$ on physical properties of PBI/CMS

Fig. S7a shows that the bulk density, skeletal density, and porosity of PBI/CMS increase with increasing  $T_C$  due to the increased mass loss. By contrast, increasing the  $T_C$  value decreases the  $d$ -spacings for the CMS samples because of the densification, as shown in Fig. S7b. These results indicate that increasing  $T_C$  increases the concentration of the free volume elements but decreases their volume. All of the CMS samples exhibit higher  $d$ -spacing than their corresponding polymer precursors. Fig. S7c shows that the mass loss of both PBI/CMS and PBI-PPA<sub>0.30</sub>/CMS increases with increasing  $T_C$  values.

#### Gas sorption isotherms of CMS samples

Fig. S8a,b displays CO<sub>2</sub> and C<sub>2</sub>H<sub>6</sub> sorption isotherms of PBI/CMS600, PBI-PPA<sub>0.30</sub>/CMS500, PBI-PPA<sub>0.30</sub>/CMS550, and PBI-PPA<sub>0.30</sub>/CMS600 at 150 °C, respectively. The sorption can be described using the dual-mode sorption model with the values of the adjustable parameters recorded in Table S5.  $C'_H$  values for CO<sub>2</sub> and C<sub>2</sub>H<sub>6</sub> increase tremendously from PBI to PBI/CMS600 because of the increased porosity. By contrast, the carbonization of PBI-PPA<sub>0.30</sub> increases the  $C'_H$  value for CO<sub>2</sub>, but decreases the  $C'_H$  value for C<sub>2</sub>H<sub>6</sub>, presumably because the newly created pores are too small for C<sub>2</sub>H<sub>6</sub> to access. In general, increasing  $T_C$  values increases the  $C'_H$  values. Fig. 8c shows the effect of carbonization on the C<sub>2</sub>H<sub>6</sub> solubility and CO<sub>2</sub>/C<sub>2</sub>H<sub>6</sub> solubility selectivity of PBI-PPA<sub>0.30</sub>/CMS at 150 °C.

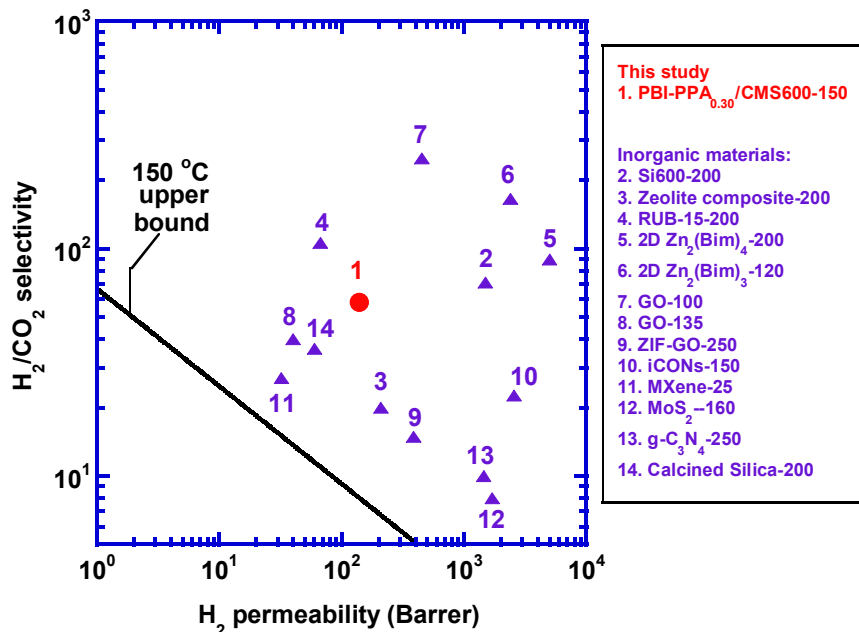

**Fig. S1.** Superior  $H_2/CO_2$  separation in PBI-PPA<sub>0.30</sub>/CMS600, demonstrated by the comparison with the leading inorganic membranes for  $H_2/CO_2$  separation. Details of these inorganic membranes are listed in Table S2.

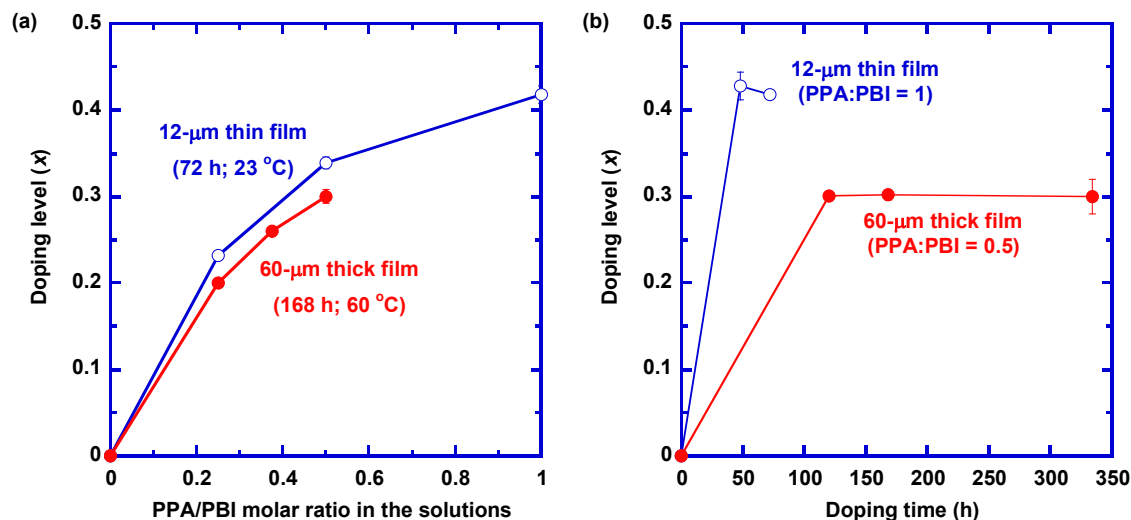

**Fig. S2.** Manipulation of the PPA doping degree in PBI thin films. (a) Effect of the PPA/PBI molar ratio in the doping solutions on the doping level in the films at equilibrium. (b) Effect of the doping time on the doping level in PBI-PPA. The molar ratio of PPA to the PBI repeating unit in the solution is 1 for PBI thin films and 0.5 for thick films.

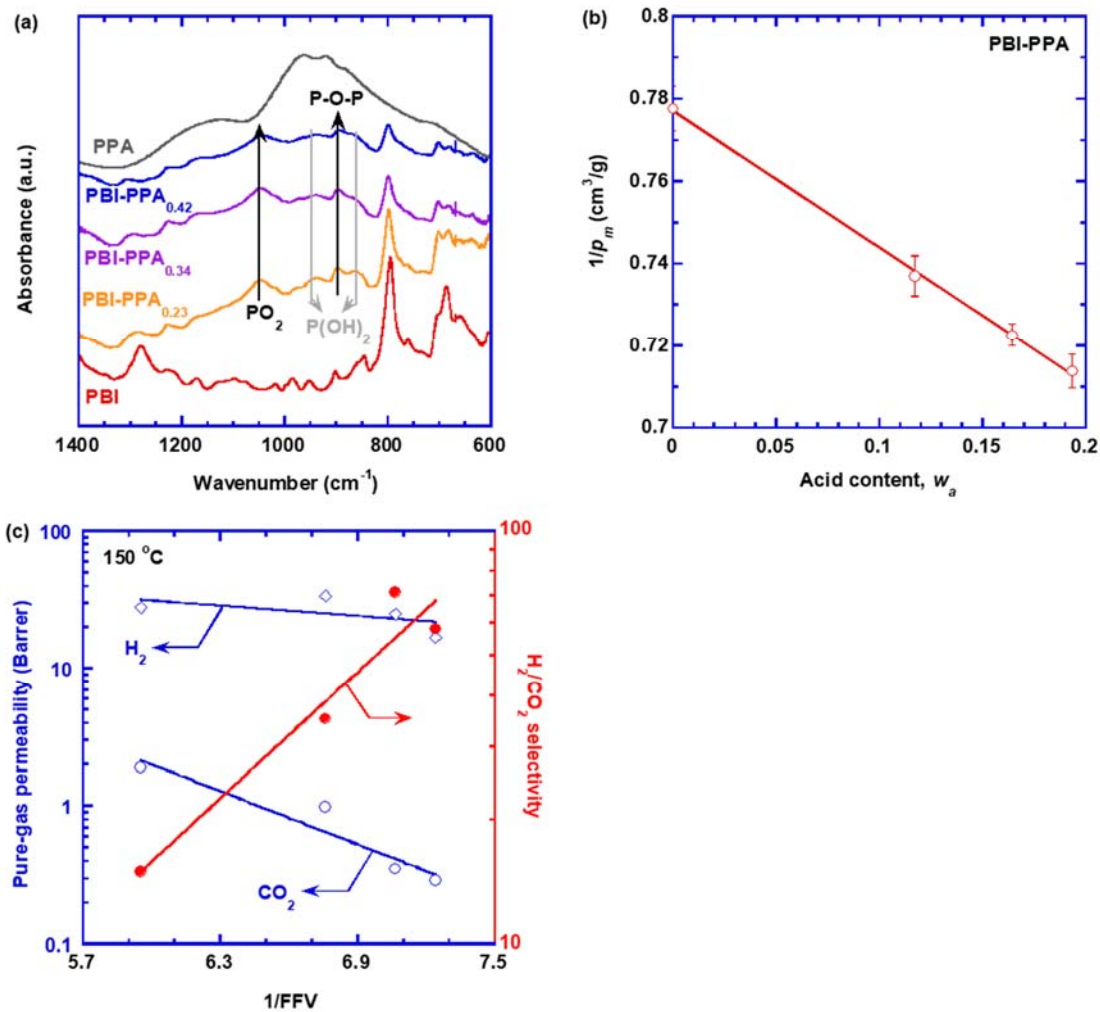

**Fig. S3.**

**Physical and gas transport properties of PBI-PPA films.** (a) FTIR spectra of PBI-PPA. (b) Correlation of  $1/p_b$  with the  $w_a$  in PBI-PPA using the additive model (Eq. S1). (c) Pure-gas  $\text{H}_2/\text{CO}_2$  separation properties of PBI-PPA as a function of  $1/\text{FFV}$ . The lines are the best fits of Eq. (3).

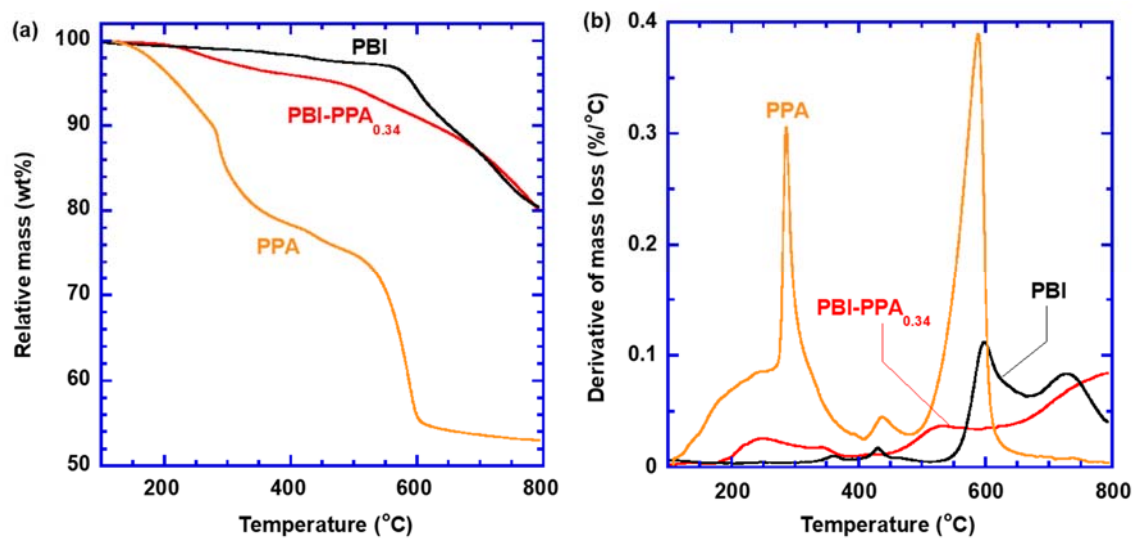

**Fig. S4.** Thermal properties of PBI, PPA, and PBI-PPA<sub>0.34</sub>. (a) Thermal gravimetric analysis (TGA) and (b) derivative thermogravimetric analysis (DTA) of PBI, PPA, and a representative PPA doped PBI sample, PBI-PPA<sub>0.34</sub>.



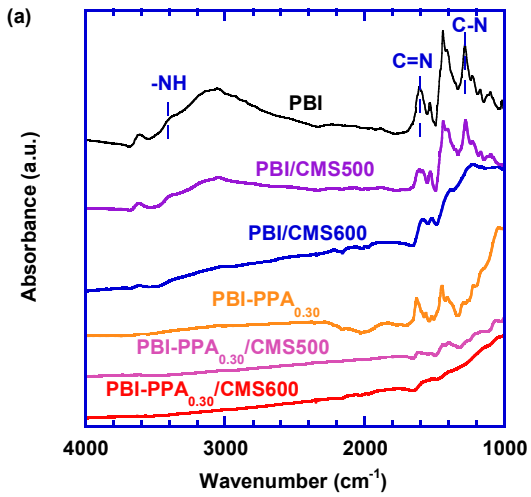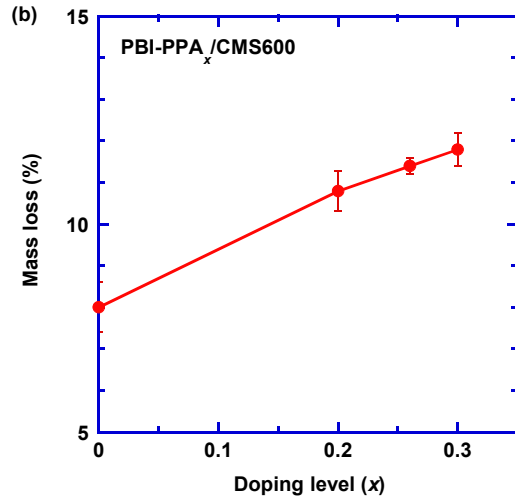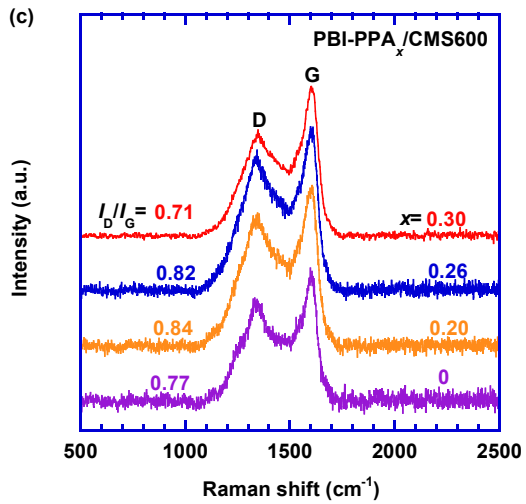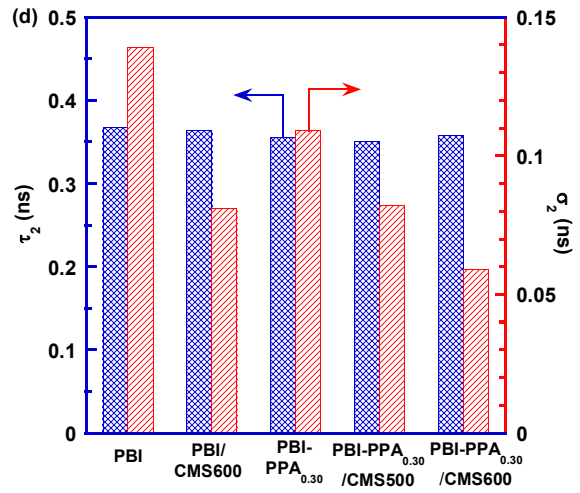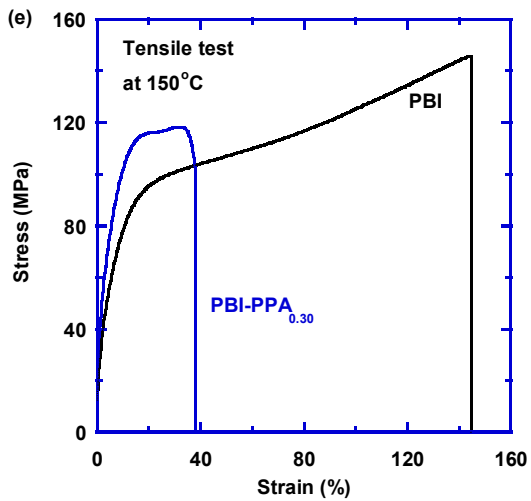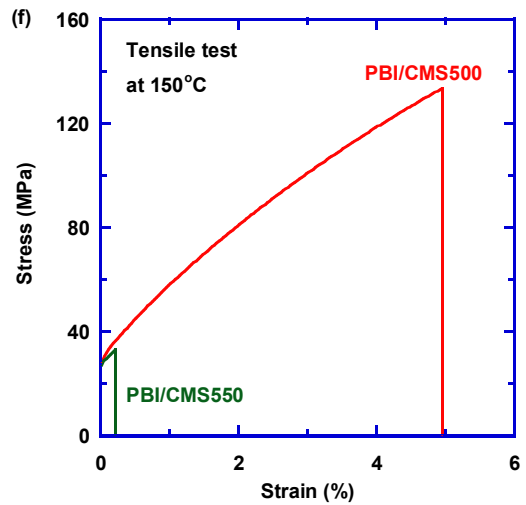

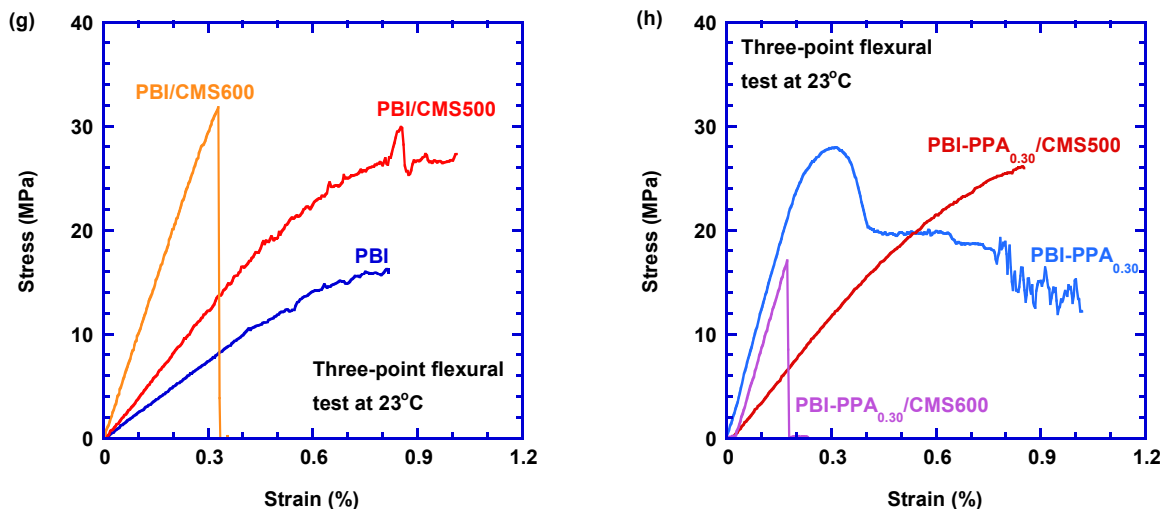

**Fig. S5.**

**Physical properties of PBI-PPA/CMS films.** (a) FTIR spectra of PBI, PBI/CMS600, PBI-PPA<sub>0.30</sub>, PBI-PPA<sub>0.30</sub>/CMS600. (b) Effect of the doping level on the mass loss of PBI-PPA when pyrolyzed at 600 °C. (c) Raman spectra of PBI-PPA/CMS600. (d) Average positron-electron annihilation lifetime ( $\tau_2$ ) and its corresponding distribution ( $\sigma_2$ ). Strain-Stress tensile plots of (e) PBI and PBI-PPA<sub>0.30</sub> films, and (f) PBI/CMS500 and PBI/CMS550 films obtained using the tensile test at 150 °C. Strain-Stress tensile plots of (g) PBI and derived CMS films, and (h) PBI-PPA<sub>0.30</sub> and derived CMS films obtained using the three-point flexural test at 23 °C.

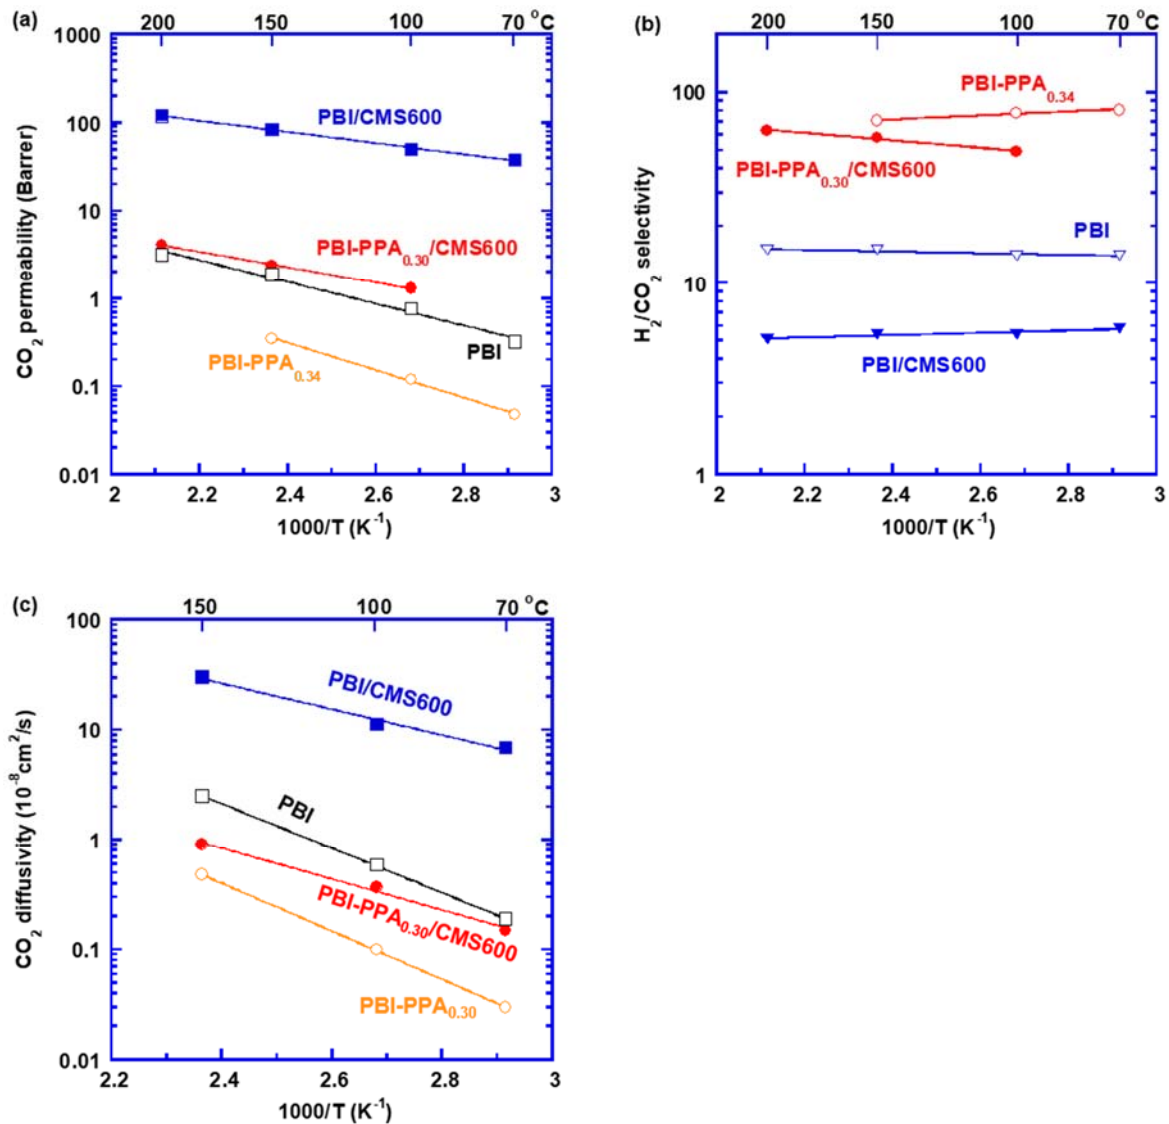

**Fig. S6.** Effect of the temperature on pure-gas transport properties of the pristine and carbonized polymers. (a)  $CO_2$  permeability, (b)  $H_2/CO_2$  selectivity, and (c)  $CO_2$  diffusivity of PBI, PBI-PPA<sub>0.34</sub>, PBI/CMS600, and PBI-PPA<sub>0.30</sub>/CMS600.

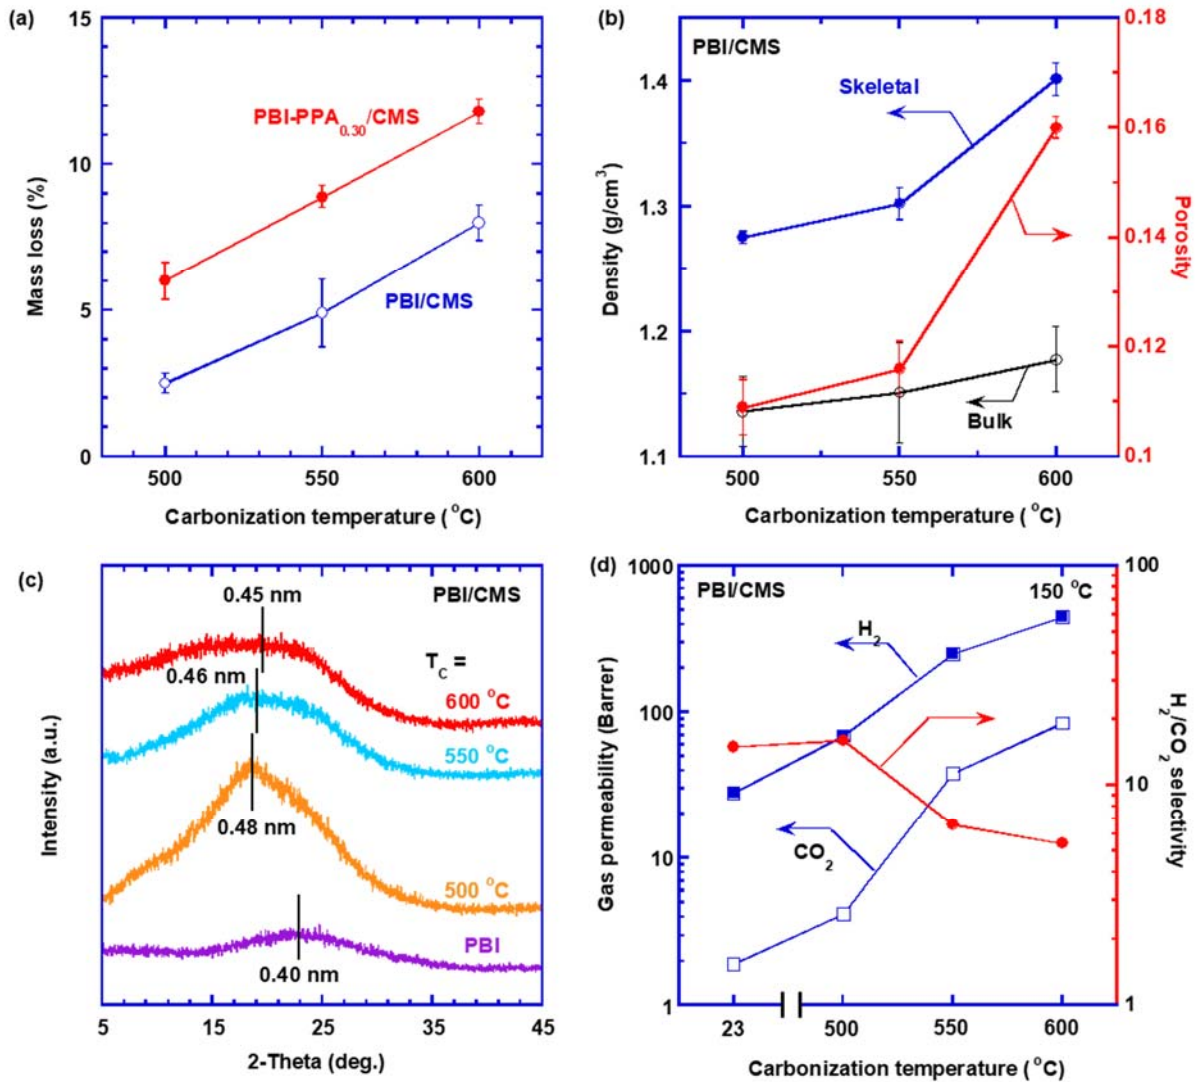

**Fig. S7.** Effect of  $T_c$  on physical and gas transport properties of PBI/CMS and PBI-PPA<sub>0.30</sub>/CMS. (a) Mass loss of PBI and PBI-PPA<sub>0.30</sub>, (b) skeletal density, bulk density, and porosity, and (c) WAXD patterns of PBI/CMS samples. (d) Pure-gas H<sub>2</sub> and CO<sub>2</sub> permeability, and H<sub>2</sub>/CO<sub>2</sub> selectivity of PBI/CMS at 150 °C.

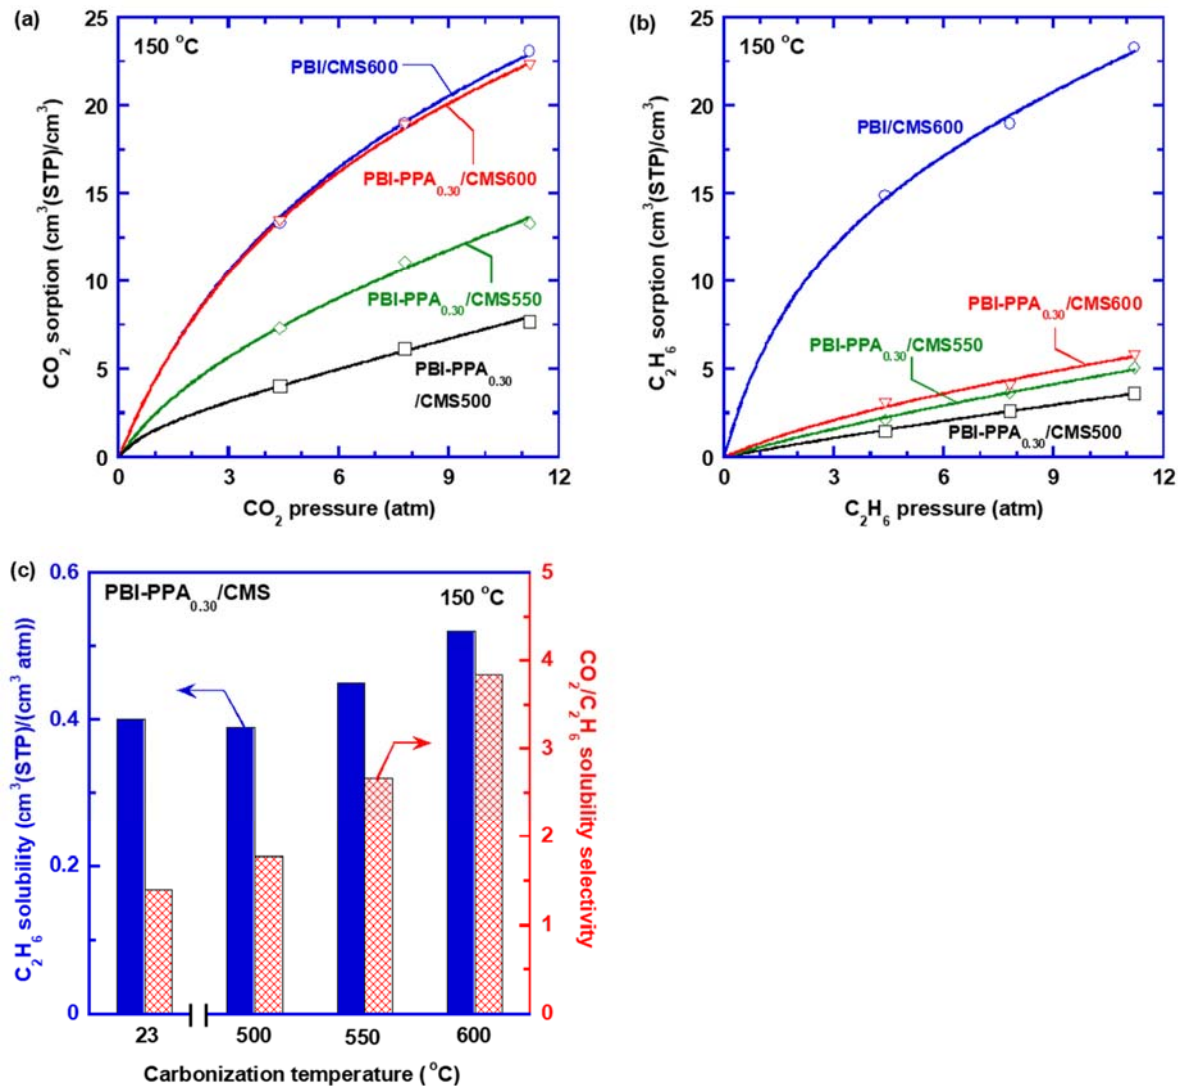

**Fig. S8.**

**Gas sorption and solubility in PBI/CMS and PBI-PPA<sub>0.30</sub>/CMS.** (a) CO<sub>2</sub> and (b) C<sub>2</sub>H<sub>6</sub> sorption isotherms of PBI/CMS600, PBI-PPA<sub>0.30</sub>/CMS500, PBI-PPA<sub>0.30</sub>/CMS550, and PBI-PPA<sub>0.30</sub>/CMS600 at 150 °C. The curves are fittings using the dual-mode sorption model with the parameters shown in Table S5. (c) C<sub>2</sub>H<sub>6</sub> solubility and CO<sub>2</sub>/C<sub>2</sub>H<sub>6</sub> solubility selectivity of PBI-PPA<sub>0.30</sub>/CMS at 150 °C and 11 atm.

**Table S1.**

H<sub>2</sub>/CO<sub>2</sub> separation properties in selected membrane materials for comparison (cf. Fig. 1F). Mixed-gas contains 50% CO<sub>2</sub> and 50% H<sub>2</sub>.

|                      | Materials                 | Mixed- or pure- gas                                   | Temp. (°C) | H <sub>2</sub> perm. (Barrer) | H <sub>2</sub> /CO <sub>2</sub> selectivity | Ref. |      |
|----------------------|---------------------------|-------------------------------------------------------|------------|-------------------------------|---------------------------------------------|------|------|
| CMS in this study    | 1                         | PBI-PPA <sub>0.34</sub>                               | Pure       | 150                           | 25                                          | 71   |      |
|                      | 2                         | PBI-PPA <sub>0.30</sub> /CMS600                       | Pure       | 150                           | 140                                         | 58   |      |
|                      |                           |                                                       | Mixed      | 150                           | 116                                         | 33   |      |
| State-of-the-art CMS | 3                         | PBI/CMS800                                            | Pure       | 100                           | 640                                         | 17   |      |
|                      | 4                         | PBI/CMS900                                            | Pure       | 100                           | 54                                          | 80   | (4)  |
|                      |                           |                                                       | Mixed      | 100                           | 39                                          | 53   |      |
|                      | 5                         | Kapton/CMS1000                                        | Pure       | 50                            | 7.2                                         | 161  | (40) |
|                      | 6                         | Kapton/CMS1100                                        | Pure       | 50                            | 0.32                                        | 343  | (40) |
|                      | 7                         | P84/CMS900                                            | Mixed      | 100                           | 20                                          | 16   | (39) |
|                      | 8                         | PBI/Matrimid/CMS1000                                  | Pure       | 35                            | 91                                          | 25   | (38) |
|                      | 9                         | Cellophane/CMS600                                     | Pure       | 30                            | 39                                          | 59   | (44) |
|                      | 10                        | Cellulose/CMS700                                      | Mixed      | 90                            | 225                                         | 31   | (2)  |
|                      | State-of-the-art polymers |                                                       | PBI        | Mixed                         | 200                                         | 45   | 15   |
| 11                   |                           | PBI-TCL(6 h)                                          | Pure       | 150                           | 21                                          | 23   | (21) |
| 12                   |                           | PBI-(H <sub>3</sub> PO <sub>4</sub> ) <sub>0.16</sub> | Pure       | 150                           | 12                                          | 35   |      |
|                      |                           |                                                       | Mixed      | 150                           | 12                                          | 34   | (24) |
| 13                   |                           | PBI-(H <sub>3</sub> PO <sub>4</sub> ) <sub>1.0</sub>  | Pure       | 150                           | 1.5                                         | 140  |      |
| 14                   |                           | PBI-(H <sub>2</sub> SO <sub>4</sub> ) <sub>0.24</sub> | Pure       | 150                           | 7.4                                         | 47   |      |
| 15                   | PBI-TBB <sub>0.213</sub>  | Pure                                                  | 150        | 9.6                           | 24                                          | (25) |      |

**Table S2.**

H<sub>2</sub>/CO<sub>2</sub> separation properties in selected inorganic membrane materials for comparison (cf. Fig. S1). Mixed-gas contains 50% CO<sub>2</sub> and 50% H<sub>2</sub>.

| Materials                             | Mixed- or pure- gas | Temp. (°C) | H <sub>2</sub> perm. (Barrer) | H <sub>2</sub> /CO <sub>2</sub> selectivity | Ref. |
|---------------------------------------|---------------------|------------|-------------------------------|---------------------------------------------|------|
| Si600                                 | Mixed               | 200        | 1493                          | 71                                          | (45) |
| Zeolite composite                     | Mixed               | 200        | 209                           | 20                                          | (54) |
| RUB-15                                | Mixed               | 200        | 67                            | 106                                         | (16) |
| 2D Zn <sub>2</sub> (Bim) <sub>4</sub> | Mixed               | 200        | 5000                          | 90                                          | (55) |
| 2D Zn <sub>2</sub> (Bim) <sub>3</sub> | Mixed               | 120        | 2400                          | 166                                         | (56) |
| GO                                    | Pure                | 135        | 40                            | 40                                          | (57) |
| GO                                    | Mixed               | 100        | 450                           | 250                                         | (46) |
| ZIF/GO                                | Mixed               | 250        | 388                           | 14.9                                        | (58) |
| iCONs                                 | Mixed               | 150        | 2566                          | 22.6                                        | (59) |
| MXene                                 | Mixed               | 25         | 32                            | 27                                          | (60) |
| MoS <sub>2</sub>                      | Pure                | 160        | 1700                          | 8                                           | (61) |
| g-C <sub>3</sub> N <sub>4</sub>       | Pure                | 250        | 1450                          | 10                                          | (14) |
| Calcined silica                       | Pure                | 200        | 60                            | 36.4                                        | (62) |

**Table S3.**

Calculation of the *FFV* values for PBI-PPA films using the group contribution method at 23°C and 150°C.

| Doping level ( <i>x</i> ) | PPA content (wt.%) | <i>V<sub>w</sub></i> (cm <sup>3</sup> /mol) | <i>ρ<sub>b</sub></i> (g/cm <sup>3</sup> ) | 23°C                            |            | <i>ā<sub>v</sub></i> (10 <sup>-5</sup> K <sup>-1</sup> ) | 150°C                           |            |
|---------------------------|--------------------|---------------------------------------------|-------------------------------------------|---------------------------------|------------|----------------------------------------------------------|---------------------------------|------------|
|                           |                    |                                             |                                           | <i>V</i> (cm <sup>3</sup> /mol) | <i>FFV</i> |                                                          | <i>V</i> (cm <sup>3</sup> /mol) | <i>FFV</i> |
| 0                         | 0                  | 154.6                                       | 1.286                                     | 239.5                           | 0.161      | 6.9                                                      | 241.6                           | 0.168      |
| 0.23                      | 11.7               | 170.6                                       | 1.357                                     | 257.1                           | 0.137      | 9.8                                                      | 260.4                           | 0.148      |
| 0.34                      | 16.4               | 178.3                                       | 1.384                                     | 266.3                           | 0.130      | 11.1                                                     | 270.0                           | 0.142      |
| 0.42                      | 19.5               | 183.9                                       | 1.401                                     | 273.2                           | 0.125      | 11.9                                                     | 277.4                           | 0.138      |

**Table S4.**

Average positron-electron annihilation lifetime ( $\tau_2$ ) and its corresponding distribution ( $\sigma_2$ ), o-Ps lifetimes and intensities of various samples. The standard deviations for all samples are based on the nonlinear least-squares fitting process carried out using a commercial software, where a reduced  $\chi^2$  of less than 1.1 was used as a metric to guide the assessment of model fit.

| Samples                         | $\tau_{2av}$ (ns) | $\sigma_2$ (ns)   | $\tau_3$ (ns)     | $I_3$ (%)      |
|---------------------------------|-------------------|-------------------|-------------------|----------------|
| PBI                             | $0.376 \pm 0.003$ | $0.109 \pm 0.008$ | $1.843 \pm 0.023$ | $18.1 \pm 0.4$ |
| PBI/CMS600                      | $0.364 \pm 0.001$ | $0.081 \pm 0.003$ | --                | --             |
| PBI-PPA <sub>0.30</sub>         | $0.361 \pm 0.002$ | $0.093 \pm 0.007$ | $1.733 \pm 0.030$ | $11.0 \pm 0.3$ |
| PBI-PPA <sub>0.30</sub> /CMS500 | $0.352 \pm 0.002$ | $0.076 \pm 0.006$ | $1.623 \pm 0.056$ | $4.1 \pm 0.3$  |
| PBI-PPA <sub>0.30</sub> /CMS600 | $0.358 \pm 0.001$ | $0.059 \pm 0.003$ | --                | --             |

**Table S5.**

Parameters of the dual-mode sorption model for CO<sub>2</sub> and C<sub>2</sub>H<sub>6</sub> sorption in various samples at 150 °C.

| Samples                         | CO <sub>2</sub> |      |        | C <sub>2</sub> H <sub>6</sub> |       |        |
|---------------------------------|-----------------|------|--------|-------------------------------|-------|--------|
|                                 | $k_D$           | $b$  | $C'_H$ | $k_D$                         | $b$   | $C'_H$ |
| PBI                             | 0.23            | 0.12 | 6.7    | 0.36                          | 0.24  | 5.9    |
| PBI/CMS600                      | 0.44            | 0.17 | 28     | 0.74                          | 0.38  | 18     |
| PBI-PPA <sub>0.34</sub>         | 0.16            | 0.20 | 6.5    | 0.18                          | 0.12  | 4.3    |
| PBI-PPA <sub>0.30</sub> /CMS500 | 0.42            | 0.37 | 3.7    | 0.25                          | 0.078 | 1.7    |
| PBI-PPA <sub>0.30</sub> /CMS550 | 0.60            | 0.30 | 8.7    | 0.32                          | 0.12  | 2.4    |
| PBI-PPA <sub>0.30</sub> /CMS600 | 0.41            | 0.17 | 27     | 0.31                          | 0.16  | 3.5    |

Note: the units for  $k_D$ ,  $b$ , and  $C'_H$  are cm<sup>3</sup>(STP) cm<sup>-3</sup>·atm<sup>-1</sup>, atm<sup>-1</sup>, and cm<sup>3</sup>(STP) cm<sup>-3</sup>, respectively.



**Table S6.**

EDS analysis of the elemental composition of the cross-sections of a PBI-PPA<sub>0.30</sub> thick film and PBI-PPA<sub>0.30</sub>/CMS600 film. Surface-center indicates the position between the surface and center.

| Samples                              | Position       | N/C molar ratio | P/C molar ratio |
|--------------------------------------|----------------|-----------------|-----------------|
| PBI thin film                        | Whole          | 0.36 ± 0.02     | 0               |
| PBI-PPA <sub>0.34</sub> thin film    | Whole          | 0.37± 0.02      | 0.034± 0.002    |
| PBI-PPA <sub>0.30</sub> thick film   | Surface        | 0.35 ± 0.01     | 0.032 ± 0.003   |
|                                      | Surface-center | 0.35 ± 0.04     | 0.029 ± 0.002   |
|                                      | Center         | 0.36 ± 0.02     | 0.021 ± 0.001   |
|                                      | Whole          | 0.36 ± 0.03     | 0.028 ± 0.001   |
| PBI-PPA <sub>0.30</sub> /CMS600 film | Surface        | 0.28 ± 0.02     | 0.030 ± 0.001   |
|                                      | Surface-center | 0.27 ± 0.01     | 0.022 ± 0.003   |
|                                      | Center         | 0.28 ± 0.02     | 0.021 ± 0.002   |
|                                      | Whole          | 0.29 ± 0.02     | 0.027 ± 0.002   |

**Table S7.**

Young's modulus, tensile strength, and fracture strain of PBI, PBI-PPA<sub>0.30</sub>, and their derived CMS films.

| Samples                         | Young's modulus (MPa) <sup>a</sup> | Tensile Strength (MPa) <sup>a</sup> | Fracture Strain (%) <sup>a</sup> | Young's modulus (MPa) <sup>b</sup> | Fracture Strain (%) <sup>b</sup> |
|---------------------------------|------------------------------------|-------------------------------------|----------------------------------|------------------------------------|----------------------------------|
| PBI                             | 1435                               | 145.9                               | 144.4                            | 2510                               | --                               |
| PBI/CMS500                      | 2871                               | 133.7                               | 5.0                              | 4060                               | --                               |
| PBI/CMS550                      | 2911                               | 33.1                                | 0.2                              | --                                 | --                               |
| PBI/CMS600                      | --                                 | --                                  | --                               | 10,000                             | 0.33                             |
| PBI-PPA <sub>0.30</sub>         | 1984                               | 118.3                               | 37.7                             | 12,300                             | --                               |
| PBI-PPA <sub>0.30</sub> /CMS500 | --                                 | --                                  | --                               | 3940                               | --                               |
| PBI-PPA <sub>0.30</sub> /CMS600 | --                                 | --                                  | --                               | 11,700                             | 0.18                             |

Note: <sup>a</sup>Data obtained using the tensile test at 150 °C. <sup>b</sup>Data obtained using the three-point flexural test at 23 °C.

**Table S8**

Summary of mechanical properties and H<sub>2</sub>/CO<sub>2</sub> separation performance of reported PBI-based membranes and CMS membranes for H<sub>2</sub>/CO<sub>2</sub> separation.

| Samples                  | Young's modulus (GPa) | Tensile strength (MPa) | Fracture strain (%) | Temp. (°C) | H <sub>2</sub> permeability (Barrer) | H <sub>2</sub> /CO <sub>2</sub> selectivity | Ref. |
|--------------------------|-----------------------|------------------------|---------------------|------------|--------------------------------------|---------------------------------------------|------|
| TADPS-TPA PBI            | 3.5                   | --                     | --                  | 35         | 5.5                                  | 20                                          |      |
| TADPS-IPA PBI            | 2.6                   | --                     | --                  | 35         | 3.6                                  | 32                                          | (50) |
| TADPS-OBA PBI            | 2.1                   | --                     | --                  | 35         | 5.7                                  | 10                                          |      |
| Undoped PANI/PBI (20/80) | 1.81                  | 26.06                  | 0.29                | 30         | 3.79                                 | 3.6                                         |      |
| Doped PANI/PBI (20/80)   | 2.06                  | 30.19                  | 12.83               | 30         | 0.841                                | 2.6                                         | (51) |
| Celazole PBI             | 3.8                   | 94                     | --                  | 35         | 2.1                                  | 28                                          |      |
| 20/80 PI/PBI+1-IM TR400  | 4.0                   | 109                    | 3.0                 | 35         | 3.1                                  | 42                                          | (20) |
| 33/67 PI/PBI+1-IM TR400  | 3.9                   | 110                    | 3.0                 | 35         | 5.3                                  | 29                                          |      |
| Cellulose/CMS550         | 2.07                  | --                     | --                  | 130        | 1400                                 | 11.1                                        |      |
| Cellulose/CMS700         | 5.69                  | --                     | --                  | 130        | 773                                  | 49.5                                        | (2)  |
| Cellulose/CMS850         | 7.53                  | --                     | --                  | 130        | 445                                  | 83.9                                        |      |

**Table S9.**

$E_{P,A}$  values for H<sub>2</sub> and CO<sub>2</sub> permeation in PBI, PBI-PPA<sub>0.34</sub>, PBI/CMS600, and PBI-PPA<sub>0.30</sub>/CMS600.

| Samples                                     | $E_{P,A}$ (kJ/mol) |                 | $P_{A,0}$ ( $\times 10^3$ Barrer) |                 |
|---------------------------------------------|--------------------|-----------------|-----------------------------------|-----------------|
|                                             | H <sub>2</sub>     | CO <sub>2</sub> | H <sub>2</sub>                    | CO <sub>2</sub> |
| PBI                                         | 24 $\pm$ 1         | 24 $\pm$ 1      | 25                                | 1.5             |
| PBI-PPA <sub>0.34</sub>                     | 28 $\pm$ 2         | 30 $\pm$ 2      | 71                                | 1.7             |
| PBI/CMS600                                  | 11 $\pm$ 1         | 12 $\pm$ 1      | 9.9                               | 2.6             |
| PBI-PPA <sub>0.30</sub> /CMS600             | 21 $\pm$ 2         | 17 $\pm$ 2      | 52                                | 0.29            |
| PBI-PPA <sub>0.30</sub> /CMS600 (mixed-gas) | 21 $\pm$ 1         | 32 $\pm$ 1      | 42                                | 31              |

**Table S10.**

$E_{D,A}$  values for CO<sub>2</sub> diffusion in PBI, PBI-PPA<sub>0.34</sub>, PBI/CMS600, and PBI-PPA<sub>0.30</sub>/CMS600.

| Samples                         | $E_{D,A}$ (kJ/mol) | $D_{A,0}$ ( $\times 10^{-5}$ cm <sup>2</sup> /s) |
|---------------------------------|--------------------|--------------------------------------------------|
| PBI                             | 39 $\pm$ 4         | 170                                              |
| PBI-PPA <sub>0.34</sub>         | 42 $\pm$ 5         | 70                                               |
| PBI/CMS600                      | 22 $\pm$ 2         | 17                                               |
| PBI-PPA <sub>0.30</sub> /CMS600 | 27 $\pm$ 3         | 2.0                                              |

## REFERENCES AND NOTES

1. D. Y. Koh, B. A. McCool, H. W. Deckman, R. P. Lively, Reverse osmosis molecular differentiation of organic liquids using carbon molecular sieve membranes. *Science* **353**, 804–807 (2016).
2. L. Lei, F. Pan, A. Lindbråthen, X. Zhang, M. Hillestad, Y. Nie, L. Bai, X. He, M. D. Guiver, Carbon hollow fiber membranes for a molecular sieve with precise-cutoff ultramicropores for superior hydrogen separation. *Nat. Commun.* **12**, 268 (2021).
3. O. Sanyal, S. S. Hays, N. E. León, Y. A. Guta, A. K. Itta, R. P. Lively, W. J. Koros, A self-consistent model for sorption and transport in polyimide-derived carbon molecular sieve gas separation membranes. *Angew. Chem. Int. Ed.* **59**, 20343–20347 (2020).
4. M. Omidvar, H. Nguyen, Liang Huang, C. M. Doherty, A. J. Hill, C. M. Stafford, X. Feng, M. T. Swihart, H. Lin, Unexpectedly strong size-sieving ability in carbonized polybenzimidazole for membrane H<sub>2</sub>/CO<sub>2</sub> separation. *ACS Appl. Mater. Interfaces* **11**, 47365–47372 (2019).
5. Y. Ma, M. L. Jue, F. Zhang, R. Mathias, H. Y. Jang, R. P. Lively, Creation of well-defined “mid-sized” micropores in carbon molecular sieve membranes. *Angew. Int. Ed. Chem.* **131**, 13393–13399 (2019).
6. J. Zhao, G. He, S. Huang, L. F. Villalobos, M. Dakhchoune, H. Bassas, K. V. Agrawal, Etching gas-sieving nanopores in single-layer graphene with an angstrom precision for high-performance gas mixture separation. *Sci. Adv.* **5**, eaav1851 (2019).
7. M. Shan, X. Liu, X. Wang, I. Yarulina, B. Seoane, F. Kapteijn, J. Gascon, Facile manufacture of porous organic framework membranes for precombustion CO<sub>2</sub> capture. *Sci. Adv.* **4**, eaau1698 (2018).
8. W. J. Koros, C. Zhang, Materials for next-generation molecularly selective synthetic membranes. *Nat. Mater.* **16**, 289–297 (2017).
9. H. Park, C. H. Jung, Y. M. Lee, A. J. Hill, S. J. Pas, S. T. Mudie, E. Van Wagner, B. D. Freeman, D. J. Cookson, Polymers with cavities tuned for fast selective transport of small molecules and ions. *Science* **318**, 254–258 (2007).

10. O. Sanyal, C. Zhang, G. B. Wenz, S. Fu, N. Bhuwania, L. Xu, M. Rungta, W. J. Koros, Next generation membranes -using tailored carbon. *Carbon* **127**, 688–698 (2018).
11. S. Kim, Y. M. Lee, Rigid and microporous polymers for gas separation membranes. *Prog. Polym. Sci.* **43**, 1–32 (2015).
12. M. Kiyono, P. J. Williams, W. J. Koros, Effect of pyrolysis atmosphere on separation performance of carbon molecular sieve membranes. *J. Membr. Sci.* **359**, 2–10 (2010).
13. L. X. Zhu, L. Huang, S. R. Venna, A. K. Blevins, Y. Ding, D. P. Hopkinson, M. T. Swihart, H. Lin, Scalable polymeric few-nanometer organosilica membranes with hydrothermal stability for selective hydrogen. *ACS Nano* **15**, 12119–12128 (2021).
14. L. F. Villalobos, M. T. Vahdat, M. Dakhchoune, Z. Nadizadeh, M. Mensi, E. Oveisi, D. Campi, N. Marzari, K. V. Agrawal, Large-scale synthesis of crystalline g-C<sub>3</sub>N<sub>4</sub> nanosheets and high-temperature H<sub>2</sub> sieving from assembled films. *Sci. Adv.* **6**, eaay9851 (2020).
15. L. Zhu, D. Yin, Y. Qin, S. Konda, S. Zhang, A. Zhu, S. Liu, T. Xu, M. T. Swihart, H. Lin, Sorption-enhanced mixed matrix membranes with facilitated hydrogen transport for hydrogen purification and CO<sub>2</sub> capture. *Adv. Funct. Mater.* **29**, 1904357 (2019).
16. M. Dakhchoune, L. F. Villalobos, R. Semino, L. Liu, M. Rezaei, P. Schouwink, C. E. Avalos, P. Baade, V. Wood, Y. Han, M. Ceriotti, K. V. Agrawal, Gas-sieving zeolitic membranes fabricated by condensation of precursor nanosheets. *Nat. Mater.* **20**, 362–369 (2021).
17. H. Park, J. Kamcev, L. M. Robeson, M. Elimelech, B. D. Freeman, Maximizing the right stuff: The trade-off between membrane permeability and selectivity. *Science* **356**, eaab0530 (2017).
18. M. Galizia, W. S. Chi, Z. P. Smith, T. C. Merkel, R. W. Baker, B. D. Freeman, 50th Anniversary perspective: Polymers and mixed matrix membranes for gas and vapor separation: A review and prospective opportunities. *Macromolecules* **50**, 7809–7843 (2017).
19. L. Hu, S. Pal, H. Nguyen, V. Bui, H. Lin, Molecularly engineering polymeric membranes for H<sub>2</sub>/CO<sub>2</sub> separation at 100–300 °C. *J. Polym. Sci.* **58**, 2467–2481 (2020).

20. J. D. Moon, A. T. Bridge, C. D'Ambra, B. D. Freeman, D. R. Paul, Gas separation properties of polybenzimidazole/thermally-rearranged polymer blends. *J. Membr. Sci.* **582**, 182–193 (2019).
21. L. Zhu, M. Swihart, H. Lin, Tightening polybenzimidazole (PBI) nanostructure via chemical cross-linking for membrane H<sub>2</sub>/CO<sub>2</sub> separation. *J. Mater. Chem. A* **5**, 19914–19923 (2017).
22. X. Li, R. P. Singh, K. W. Dudeck, K. A. Berchtold, B. C. Benicewicz, Influence of polybenzimidazole main chain structure on H<sub>2</sub>/CO<sub>2</sub> separation at elevated temperatures. *J. Membr. Sci.* **461**, 59–68 (2014).
23. L. Hu, V. T. Bui, L. Huang, R. P. Singh, H. Lin, Facilely cross-linking polybenzimidazole with polycarboxylic acids to improve H<sub>2</sub>/CO<sub>2</sub> separation performance. *ACS Appl. Mater. Interfaces* **13**, 12521–12530 (2021).
24. L. Zhu, M. Swihart, H. Lin, Unprecedented size-sieving ability in polybenzimidazole doped with polyprotic acids for membrane H<sub>2</sub>/CO<sub>2</sub> separation. *Energ. Environ. Sci.* **11**, 94–100 (2018).
25. A. Naderi, A. A. Tashvigh, T. S. Chung, H<sub>2</sub>/CO<sub>2</sub> separation enhancement via chemical modification of polybenzimidazole nanostructure. *J. Membr. Sci.* **572**, 343–349 (2019).
26. H. Lin, M. Yavari, Upper bound of polymeric membranes for mixed-gas CO<sub>2</sub>/CH<sub>4</sub> separations. *J. Membr. Sci.* **475**, 101–109 (2015).
27. Y. Cao, K. Zhang, O. Sanyal, W. J. Koros, Carbon molecular sieve membrane preparation by economical coating and pyrolysis of porous polymer hollow fibers. *Angew. Chem. Int. Ed.* **58**, 12149–12153 (2019).
28. W. Jiao, Y. Ban, Z. Shi, X. Jiang, Y. Li, W. Yang, Gas separation performance of supported carbon molecular sieve membranes based on soluble polybenzimidazole. *J. Membr. Sci.* **533**, 1–10 (2017).
29. Y. Xiao, T. S. Chung, Grafting thermally labile molecules on cross-linkable polyimide to design membrane materials for natural gas purification and CO<sub>2</sub> capture. *Energ. Environ. Sci.* **4**, 201–208 (2011).

30. C.-P. Hu, C. K. Polintan, L. L. Tayo, S.-C. Chou, H.-A. Tsai, W.-S. Hung, C.-C. Hu, K.-R. Lee, J.-Y. Lai, The gas separation performance adjustment of carbon molecular sieve membrane depending on the chain rigidity and free volume characteristic of the polymeric precursor. *Carbon* **143**, 343–351 (2019).
31. C. Zhang, W. J. Koros, Ultraselective carbon molecular sieve membranes with tailored synergistic sorption selective properties. *Adv. Mater.* **29**, 170163 (2017).
32. H. B. Park, Y. M. Lee, Fabrication and characterization of nanoporous carbon/silica membranes. *Adv. Mater.* **17**, 477–483 (2005).
33. J. S. Adams, A. K. Itta, C. Zhang, G. B. Wenz, O. Sanyal, W. J. Koros, New insights into structural evolution in carbon molecular sieve membranes during pyrolysis. *Carbon* **141**, 238–246 (2019).
34. O. Salinas, X. Ma, Y. Wang, Y. Han, I. Pinnau, Carbon molecular sieve membrane from a microporous spirobisindane-based polyimide precursor with enhanced ethylene/ethane mixed-gas selectivity. *RSC Adv.* **7**, 3265–3272 (2017).
35. S. Fu, G. B. Wenz, E. S. Sanders, S. S. Kulkarni, W. Qiu, C. Ma, W. J. Koros, Effects of pyrolysis conditions on gas separation properties of 6FDA/DETDA: DABA (3: 2) derived carbon molecular sieve membranes. *J. Membr. Sci.* **520**, 699–711 (2016).
36. J. M. Pérez-Francisco, J. L. Santiago-García, M. I. Loría-Bastarrachea, D. R. Paul, B. D. Freeman, M. Aguilar-Vega, CMS membranes from PBI/PI blends: Temperature effect on gas transport and separation performance. *J. Membr. Sci.* **597**, 117703 (2020).
37. L. Xu, M. Rungta, W. J. Koros, Matrimid® derived carbon molecular sieve hollow fiber membranes for ethylene/ethane separation. *J. Membr. Sci.* **380**, 138–147 (2011).
38. S. S. Hosseini, T. S. Chung, Carbon membranes from blends of PBI and polyimides for N<sub>2</sub>/CH<sub>4</sub> and CO<sub>2</sub>/CH<sub>4</sub> separation and hydrogen purification. *J. Membr. Sci.* **328**, 174–185 (2009).

39. E. P. Favvas, E. P. Kouvelos, G. E. Romanos, G. I. Pilatos, A. C. Mitropoulos, N. K. Kanellopoulos, Characterization of highly selective microporous carbon hollow fiber membranes prepared from a commercial co-polyimide precursor. *J. Porous Mater.* **15**, 625–633 (2008).
40. H. Hatori, H. Takagi, Y. Yamada, Gas separation properties of molecular sieving carbon membranes with nanopore channels. *Carbon* **42**, 1169–1173 (2004).
41. K. Hazazi, X. Ma, Y. Wang, W. Ogieglo, A. Alhazmi, Y. Han, I. Pinnau, Ultra-selective carbon molecular sieve membranes for natural gas separations based on a carbon-rich intrinsically microporous polyimide precursor. *J. Membr. Sci.* **585**, 1–9 (2019).
42. X. Ma, J. Lin, in *Modern Inorganic Synthetic Chemistry* (Elsevier, 2017), pp. 669–686.
43. N. Du, H. B. Park, G. P. Robertson, M. M. Dal-Cin, T. Visser, L. Scoles, M. D. Guiver, Polymer nanosieve membranes for CO<sub>2</sub>-capture applications. *Nat. Mater.* **10**, 372–375 (2011).
44. M. C. Campo, F. D. Magalhaes, A. Mendes, Carbon molecular sieve membranes from cellophane paper. *J. Membr. Sci.* **350**, 180–188 (2010).
45. R. M. De Vos, H. Verweij, High-selectivity, high-flux silica membranes for gas separation. *Science* **279**, 1710–1711 (1998).
46. H. Li, Z. Song, X. Zhang, Y. Huang, S. Li, Y. Mao, H. J. Ploehn, Y. Bao, M. Yu, Ultrathin, molecular-sieving graphene oxide membranes for selective hydrogen separation. *Science* **342**, 95–98 (2013).
47. M. Myglovets, O. I. Poddubnaya, O. Sevastyanova, M. E. Lindström, B. Gawdzik, M. Sobiesiak, M. M. Tsyba, V. I. Sapsay, D. O. Klymchuk, A. M. Puziy, Preparation of carbon adsorbents from lignosulfonate by phosphoric acid activation for the adsorption of metal ions. *Carbon* **80**, 771–783 (2014).
48. L. Hu, J. Liu, L. Zhu, X. Hou, L. Huang, H. Lin, J. Cheng, Highly permeable mixed matrix materials comprising ZIF-8 nanoparticles in rubbery amorphous poly(ethylene oxide) for CO<sub>2</sub> capture. *Sep. Purif. Technol.* **205**, 58–65 (2018).



49. B. Schultrich, H. J. Scheibe, G. Grandremy, D. Schneider, Elastic modulus of amorphous carbon films. *Phys. Status Solidi* **145**, 385–392 (1994).
50. H. Borjigin, K. A. Stevens, R. Liu, J. D. Moon, A. T. Shaver, S. Swinnea, B. D. Freeman, J. S. Riffle, J. E. McGrath, Synthesis and characterization of polybenzimidazoles derived from tetraaminodiphenylsulfone for high temperature gas separation membranes. *Polymer* **71**, 135–142 (2015).
51. V. Giel, J. Kredatusová, M. Trchová, J. Brus, J. Žitka, J. Peter, Polyaniline/polybenzimidazole blends: Characterisation of its physico-chemical properties and gas separation behaviour. *Eur. Polym. J.* **77**, 98–113 (2016).
52. S. Gadipelli, W. Travis, W. Zhou, Z. Guo, A thermally derived and optimized structure from ZIF-8 with giant enhancement in CO<sub>2</sub> uptake. *Energ. Environ. Sci.* **7**, 2232–2238 (2014).
53. T. Sugama, Hydrothermal degradation of polybenzimidazole coating. *Mater. Lett.* **58**, 1307–1312 (2004).
54. M. Yu, H. H. Funke, R. D. Noble, J. L. Falconer, H<sub>2</sub> separation using defect-free, inorganic composite membranes. *J. Am. Chem. Soc.* **133**, 1748–1750 (2011).
55. Y. Peng, Y. Li, Y. Ban, H. Jin, W. Jiao, X. Liu, W. Yang, Metal-organic framework nanosheets as building blocks for molecular sieving membranes. *Science* **346**, 1356–1359 (2014).
56. Y. Peng, Y. Li, Y. Ban, W. Yang, Two-dimensional metal-organic framework nanosheets for membrane-based gas separation. *Angew. Chem. Int. Ed.* **56**, 9757–9761 (2017).
57. H. W. Kim, H. W. Yoon, S.-M. Yoon, B. M. Yoo, B. K. Ahn, Y. H. Cho, H. J. Shin, H. Yang, U. Paik, S. Kwon, J.-Y. Choi, H. B. Park, Selective gas transport through few-layered graphene and graphene oxide membranes. *Science* **342**, 91–95 (2013).
58. A. Huang, Q. Liu, N. Wang, Y. Zhu, J. Caro, Bicontinuous zeolitic imidazolate framework ZIF-8@GO membrane with enhanced hydrogen selectivity. *J. Am. Chem. Soc.* **136**, 14686–14689 (2014).

59. Y. Ying, M. Tong, S. Ning, S. K. Ravi, S. B. Peh, S. C. Tan, S. J. Pennycook, D. Zhao, Ultrathin two-dimensional membranes assembled by ionic covalent organic nanosheets with reduced apertures for gas separation. *J. Am. Chem. Soc.* **142**, 4472–4480 (2020).
60. J. Shen, G. Liu, Y. Ji, Q. Liu, L. Cheng, K. Guan, M. Zhang, G. Liu, J. Xiong, J. Yang, W. Jin, 2D MXene nanofilms with tunable gas transport channels. *Adv. Funct. Mater.* **28**, 1801511 (2018).
61. A. Achari, S. Sahana, M. Eswaramoorthy, High performance MoS<sub>2</sub> membranes: Effects of thermally driven phase transition on CO<sub>2</sub> separation efficiency. *Energ. Environ. Sci.* **9**, 1224–1228 (2016).
62. H. Song, Y. Wei, H. Qi, Tailoring pore structures to improve the permselectivity of organosilica membranes by tuning calcination parameters. *J. Mater. Chem. A* **5**, 24657–24666 (2017).
